# Supplementary material
Source: publisher site journal article supplement (https://www.degruyter.com/publication/journal_key/OPPHIL/downloadAsset/OPPHIL_CFP%20The%20Human%20Being%20and%20Time%20From%20Kant%20to%20Existentialism%20second%20call.pdf)
Supplement: Supplementary file 1 [file OPPHIL_CFP%20The%20Human%20Being%20and%20Time%20From%20Kant%20to%20Existentialism%20second%20call.pdf]

# THE HUMAN BEING AND TIME: FROM KANT TO EXISTENTIALISM (second call)

Open Philosophy (<https://www.degruyter.com/opphil>) invites submissions for the topical issue "The Human Being and Time: From Kant to Existentialism", edited by Addison Ellis (The American University in Cairo).

## DESCRIPTION

It is uncontroversial to say that one of the most significant topics in the history of philosophy is the relation between the human being and time. This theme takes center stage especially in the Kantian and Post-Kantian tradition (the latter including especially German idealism and existentialism). The connection between being *human* and being *inside* or *outside* time is not only a pervasive theme across these periods, but one that is non-accidentally shared in a continuous historical thread from Kant, Fichte, Schelling, Hegel, Husserl, Heidegger, Sartre, up to the present day. For all these figures, it is essential that we understand the link between (for instance) *time and experience*, *time and freedom*, *time and morality (or evil)*, *time and the limits of human nature*, and *time and ontology itself*. And yet, there are many important questions in this arena that have long been woefully out of focus in academic philosophy. Within Kant scholarship alone, it is an under-explored question how we should understand the different *functions* of the representation of time (what, for instance, is the 'timelessness' of freedom when the exercise of freedom is inextricably linked with a time? Or, what is the relation between time as an *empty* form of intuition [a kind of 'nothing' according to Kant!] and the form of thought, given that thought appears to be essentially 'tensed' and yet stands outside of the merely 'given' forms of sensibility?). But *between* Kant and post-Kantian figures, the questions multiply.

While there has been scattered attention across the decades, very little has been written on the following questions:

- How should we understand the way(s) in which Kierkegaard interprets and/or transforms Kant's own account of the relation between the thinking/acting subject and time (what, for instance, is the difference between the 'timelessness' of freedom in Kant and the eternal in Kierkegaard?)
- Similarly, how should we understand the significance of temporal relations or temporal self-location in connection to human meaning or purpose in Kierkegaard and/or Heidegger (by reference to *Wiederholung* or the *Augenblick*, for example)?
- How might the above accounts relate to Fichte's connection between the unconditional determining 'I' of reason and *immortality* in the *Vocation of Man*?)
- Given that Sartre's conception of the 'I' that is 'nothing' is explicitly related by him to Kant's discussion of the elusive 'I' from the *Critique of Pure Reason*, should we understand this as a valuable interpretive step or an essentially transformative and revisionary conception of Kant's central insight?

Papers addressing the above topics would be especially welcome, though these are merely examples of what a suitable submission may look like.

Authors publishing their articles in the special issue will benefit from:

- transparent, comprehensive and fast peer review,
- efficient route to fast-track publication and full advantage of De Gruyter's e-technology,
- free language assistance for authors from non-English speaking regions.

Because *Open Philosophy* is published under an Open Access model, as a rule, publication costs should be covered by so called Article Publishing Charges (APC), paid by authors, their affiliated institutions, funders or sponsors.

Authors without access to publishing funds are encouraged to discuss potential discounts or waivers with Managing Editor of the journal Katarzyna Tempczyk (katarzyna.tempczyk@degruyter.com) before submitting their manuscripts.

## HOW TO SUBMIT

---

Submissions will be collected until March 31, 2024.

To submit an article for the special issue of *Open Philosophy*, authors are asked to access the online submission system at: <http://www.editorialmanager.com/opphil/>

Please choose as article type: The Human Being and Time

Before submission the authors should carefully read over the Instruction for Authors, available at:

[https://www.degruyter.com/publication/journal\\_key/OPPHIL/downloadAsset/OPPHIL\\_Instruction%20for%20Authors.pdf](https://www.degruyter.com/publication/journal_key/OPPHIL/downloadAsset/OPPHIL_Instruction%20for%20Authors.pdf)

All contributions will undergo critical review before being accepted for publication.

Further questions about this thematic issue can be addressed to Addison Ellis at acellis2@gmail.com. In case of technical problems with submission please write to AssistantManagingEditor@degruyter.com

Find us on facebook: <https://www.facebook.com/DGOpenPhilosophy>
